# Supplementary material for: Evaluation of the Performance of the Novodiag® Stool Parasites Assay for the Detection of Intestinal Protozoa and Microsporidia
Source: MDPI journal article supplement (doi:10.3390/pathogens12070889), 2023-06-29
Supplement: s1 [file s1]

## Supplementary Data

**Table S1.** Targets of the Novodiag® Stool Parasites (NSP) assay.

| Protozoa targeted by the NSP                                                  |
|-------------------------------------------------------------------------------|
| <i>Balantidium coli</i>                                                       |
| <i>Blastocystis</i> spp.                                                      |
| <i>Cryptosporidium</i> spp. <sup>a</sup>                                      |
| <i>Cyclospora cayetanensis</i>                                                |
| <i>Cystoisospora belli</i>                                                    |
| <i>Dientamoeba fragilis</i>                                                   |
| <i>Entamoeba histolytica</i>                                                  |
| <i>Giardia intestinalis</i>                                                   |
| Microsporidia targeted by the NSP                                             |
| <i>Encephalitozoon</i> spp. <sup>b</sup>                                      |
| <i>Enterocytozoon bieneusi</i>                                                |
| Helminths targeted by the NSP                                                 |
| <i>Ancylostoma duodenale</i>                                                  |
| <i>Ascaris lumbricoides</i> / suum                                            |
| <i>Clonorchis sinensis</i> / <i>Opisthorchis</i> spp. / <i>Metorchis</i> spp. |
| <i>Diphyllobothrium latum</i> / <i>nihonkaiense</i>                           |
| <i>Enterobius vermicularis</i>                                                |
| <i>Fasciola</i> spp. <sup>c</sup>                                             |
| <i>Fasciolopsis buski</i>                                                     |
| <i>Hymenolepis diminuta</i>                                                   |
| <i>Hymenolepis nana</i>                                                       |
| <i>Necator americanus</i>                                                     |
| <i>Schistosoma mansoni</i>                                                    |
| <i>Schistosoma</i> spp. <sup>d</sup>                                          |
| <i>Strongyloides stercoralis</i>                                              |
| <i>Taenia saginata</i> / <i>asiatica</i>                                      |
| <i>Taenia solium</i>                                                          |
| <i>Trichuris</i> spp.                                                         |

<sup>a</sup> — Detection of at least *C. hominis*, *C. meleagridis*, *C. parvum*, *C. ubiquitum* and *Cryptosporidium* spp. Chipmunk genotype I. <sup>b</sup> — Detection of at least *E. cuniculi*, *E. hellem* and *E. intestinalis*. <sup>c</sup> — Detection of *F. hepatica* and *F. gigantica*. <sup>d</sup> — Detection of at least *S. bovis*, *S. curassoni*, *S. edwardiense*, *S. haematobium*, *S. hippopotami*, *S. incognitum*, *S. intercalatum*, *S. japonicum*, *S. leiperi*, *S. malayensis*, *S. mansoni*, *S. margrebowiei*, *S. mattheei*, *S. mekongi* and *S. sinensium*.
